# Supplementary material
Source: Elsevier journal article supplement (https://authors.library.caltech.edu/58736/5/mmc4.xlsx)
Supplement: mmc4 [file mmc4.xlsx]

## Sheet: Sheet1
BG505 SOSIP immunized MuVH
Mouse #16					Mouse #17					Mouse #18
V	J	CDR3	LEN		V	J	CDR3	LEN		V	J	CDR3	LEN
IGKV10-94*01	IGKJ4*01	QHYET	5		IGKV10-94*01	IGKJ1*01	QHYET	5		IGKV10-94*01	IGKJ1*01	QHYET	5
IGKV10-94*01	IGKJ4*01	QHYET	5		IGKV10-94*01	IGKJ1*01	QHYET	5		IGKV10-94*01	IGKJ1*01	QHYET	5
IGKV10-94*01	IGKJ1*01	QHYET	5		IGKV10-94*01	IGKJ1*01	QHYET	5		IGKV10-94*01	IGKJ1*01	QHYET	5
IGKV10-94*01	IGKJ1*01	QHYET	5		IGKV10-94*01	IGKJ1*01	QHYET	5		IGKV10-94*01	IGKJ1*01	QHYET	5
IGKV10-94*01	IGKJ1*01	QHYET	5		IGKV10-94*01	IGKJ1*01	QHYET	5		IGKV10-94*01	IGKJ1*01	QHYET	5
IGKV10-94*01	IGKJ1*01	QHYET	5		IGKV10-94*01	IGKJ1*01	QHYET	5		IGKV10-94*01	IGKJ1*01	QHYET	5
IGKV10-94*01	IGKJ1*01	QHYET	5		IGKV10-94*01	IGKJ1*01	QHYET	5		IGKV10-94*01	IGKJ1*01	QHYET	5
IGKV10-94*01	IGKJ4*01	QHYET	5		IGKV10-94*01	IGKJ1*01	QHYEA	5		IGKV10-94*01	IGKJ1*01	QHYET	5
IGKV10-94*01	IGKJ4*01	QHYET	5		IGKV10-94*01	IGKJ1*01	QHYEA	5		IGKV10-94*01	IGKJ1*01	QHYET	5
IGKV10-94*01	IGKJ1*01	QHYET	5		IGKV10-94*01	IGKJ1*01	QHYET	5		IGKV10-94*01	IGKJ1*01	QHYET	5
IGKV10-94*01	IGKJ1*01	QHYET	5		IGKV10-94*01	IGKJ1*01	QHYET	5		IGKV10-94*01	IGKJ1*01	QHYET	5
IGKV10-94*01	IGKJ1*01	QHYET	5		IGKV10-94*01	IGKJ1*01	QHYET	5		IGKV10-94*01	IGKJ1*01	QHYET	5
IGKV10-94*01	IGKJ1*01	QHYET	5		IGKV10-94*01	IGKJ1*01	QHYET	5		IGKV10-94*01	IGKJ1*01	QHYET	5
IGKV10-94*01	IGKJ1*01	QHYET	5		IGKV10-94*01	IGKJ1*01	QHYET	5		IGKV10-94*01	IGKJ1*01	QHYET	5
IGKV10-94*01	IGKJ1*01	QHYET	5		IGKV10-94*01	IGKJ1*01	QHYET	5		IGKV10-94*01	IGKJ1*01	QHYET	5
IGKV10-94*01	IGKJ1*01	QHYET	5		IGKV10-94*01	IGKJ1*01	QHYET	5		IGKV10-94*01	IGKJ1*01	QHYET	5
IGKV10-94*01	IGKJ4*01	QHYET	5		IGKV10-94*01	IGKJ1*01	QHYET	5		IGKV10-94*01	IGKJ1*01	QHYET	5
IGKV10-94*01	IGKJ1*01	QHYET	5		IGKV10-94*01	IGKJ1*01	QHYET	5		IGKV10-94*01	IGKJ1*01	QHYET	5
IGKV10-94*01	IGKJ1*01	QHYET	5		IGKV10-94*01	IGKJ1*01	QHYET	5		IGKV10-94*01	IGKJ1*01	QHYET	5
IGKV10-94*01	IGKJ1*01	QHYET	5		IGKV10-94*01	IGKJ1*01	QHYET	5		IGKV10-94*01	IGKJ1*01	QHYET	5
IGKV10-94*01	IGKJ1*01	QHYET	5		IGKV10-94*01	IGKJ1*01	QHYEA	5		IGKV10-94*01	IGKJ1*01	QHYET	5
IGKV10-94*01	IGKJ4*01	QHYET	5		IGKV10-94*01	IGKJ1*01	QHYEA	5		IGKV10-94*01	IGKJ1*01	QHYET	5
IGKV10-94*01	IGKJ1*01	QHYET	5		IGKV10-94*01	IGKJ1*01	QHYEA	5		IGKV10-94*01	IGKJ1*01	QHYET	5
IGKV10-94*01	IGKJ1*01	QHYET	5		IGKV10-94*01	IGKJ1*01	QHYEA	5		IGKV10-94*01	IGKJ1*01	QHYET	5
IGKV10-94*01	IGKJ1*01	QHYET	5		IGKV10-94*01	IGKJ1*01	QQYST	5		IGKV10-94*01	IGKJ1*01	QHYET	5
IGKV10-94*01	IGKJ1*01	QHYET	5		IGKV10-94*01	IGKJ1*01	QQYET	5		IGKV10-94*01	IGKJ1*01	QHYET	5
IGKV10-94*01	IGKJ1*01	QHYET	5		IGKV10-94*01	IGKJ1*01	QQYET	5		IGKV10-94*01	IGKJ1*01	QHYET	5
IGKV10-94*01	IGKJ1*01	QHYET	5		IGKV10-94*01	IGKJ1*01	QQYET	5		IGKV10-94*01	IGKJ1*01	QHYET	5
IGKV10-94*01	IGKJ1*01	QHYET	5		IGKV10-94*01	IGKJ1*01	QQYET	5		IGKV10-94*01	IGKJ1*01	QHYET	5
IGKV10-94*01	IGKJ1*01	QHYET	5		IGKV10-94*01	IGKJ1*01	QQYET	5		IGKV10-94*01	IGKJ1*01	QHYET	5
IGKV10-94*01	IGKJ1*01	QHYET	5		IGKV10-94*01	IGKJ1*01	QQYET	5		IGKV10-94*01	IGKJ1*01	QHYET	5
IGKV10-94*01	IGKJ1*01	QHYET	5		IGKV10-94*01	IGKJ1*01	NHYET	5		IGKV10-94*01	IGKJ1*01	QHYET	5
IGKV10-94*01	IGKJ1*01	QHYET	5		IGKV10-94*01	IGKJ1*01	QHYET	5		IGKV10-94*01	IGKJ1*01	QHYET	5
IGKV10-94*01	IGKJ1*01	QHYET	5		IGKV10-94*01	IGKJ1*01	QHYET	5		IGKV10-94*01	IGKJ1*01	QHYET	5
IGKV10-94*01	IGKJ1*01	QHYET	5		IGKV10-94*01	IGKJ1*01	QHYET	5		IGKV10-94*01	IGKJ1*01	QHYET	5
IGKV10-94*01	IGKJ1*01	QHYET	5		IGKV10-94*01	IGKJ1*01	QHYET	5		IGKV10-94*01	IGKJ1*01	QHYET	5
IGKV10-94*01	IGKJ1*01	QHYET	5		IGKV10-94*01	IGKJ1*01	QHYET	5		IGKV10-94*01	IGKJ1*01	QHYET	5
IGKV10-94*01	IGKJ1*01	QHYET	5		IGKV10-94*01	IGKJ1*01	QHYET	5		IGKV10-94*01	IGKJ1*01	QHYET	5
IGKV10-94*01	IGKJ1*01	QHYET	5		IGKV10-94*01	IGKJ1*01	QHYET	5		IGKV10-94*01	IGKJ1*01	QHYET	5
IGKV10-94*01	IGKJ1*01	QHYET	5		IGKV10-94*01	IGKJ1*01	QHYET	5		IGKV10-94*01	IGKJ1*01	QHYET	5
IGKV10-94*01	IGKJ1*01	QHYET	5		IGKV10-94*01	IGKJ1*01	QHLET	5		IGKV10-94*01	IGKJ1*01	QHYET	5
IGKV10-94*01	IGKJ4*01	QQYET	5		IGKV10-94*01	IGKJ1*01	QHYET	5		IGKV10-94*01	IGKJ1*01	QHYET	5
IGKV10-94*01	IGKJ4*01	QQYET	5		IGKV10-94*01	IGKJ1*01	QHYET	5		IGKV10-94*01	IGKJ1*01	QHYET	5
IGKV10-94*01	IGKJ1*01	QQYET	5		IGKV10-94*01	IGKJ1*01	QHYET	5		IGKV10-94*01	IGKJ1*01	QHYET	5
IGKV10-94*01	IGKJ1*01	QQYET	5		IGKV10-94*01	IGKJ1*01	QHYET	5		IGKV10-94*01	IGKJ1*01	QHYET	5
IGKV10-94*01	IGKJ4*01	QHYET	5		IGKV10-94*01	IGKJ1*01	QHYET	5		IGKV10-94*01	IGKJ1*01	QHYET	5
IGKV10-94*01	IGKJ4*01	QHYET	5		IGKV10-94*01	IGKJ1*01	QHYET	5		IGKV10-94*01	IGKJ1*01	QHYET	5
IGKV10-94*01	IGKJ1*01	QHYET	5		IGKV10-94*01	IGKJ1*01	QHYET	5		IGKV10-94*01	IGKJ1*01	QHYET	5
IGKV10-94*01	IGKJ1*01	QHYET	5		IGKV10-94*01	IGKJ1*01	QHYET	5		IGKV10-94*01	IGKJ1*01	QHYET	5
IGKV10-94*01	IGKJ1*01	QHYET	5		IGKV10-94*01	IGKJ1*01	QHYET	5		IGKV10-94*01	IGKJ1*01	QHYET	5
IGKV10-94*01	IGKJ4*01	QHYET	5		IGKV10-94*01	IGKJ1*01	QHYET	5		IGKV10-94*01	IGKJ1*01	QHYET	5
IGKV10-94*01	IGKJ1*01	QHYET	5		IGKV10-94*01	IGKJ1*01	QHYET			IGKV10-94*01	IGKJ1*01	QHYET	5
IGKV10-94*01	IGKJ1*01	QHXEA	5		IGKV10-94*01	IGKJ1*01				IGKV10-94*01	IGKJ1*01	QHYET	5
IGKV10-94*01	IGKJ1*01	QHYET	5							IGKV10-94*01	IGKJ1*01	QHYET	5
IGKV10-94*01	IGKJ1*01	QHYEA	5		IGKV3-4*01	IGKJ4*01	QQSNEL	6		IGKV10-94*01	IGKJ1*01	QHYET	5
IGKV10-94*01	IGKJ1*01	QHYEA	5		IGKV3-4*01	IGKJ4*01	QQSNEE	6		IGKV10-94*01	IGKJ1*01	QHYET	5
IGKV10-94*01	IGKJ1*01	QQYEA	5		IGKV3-4*01	IGKJ4*01	QQSNEL	6		IGKV10-94*01	IGKJ1*01	QHYET	5
IGKV10-94*01	IGKJ1*01	QHYSS	5		IGKV3-4*01	IGKJ4*01	QQSNEL	6		IGKV10-94*01	IGKJ1*01	QHYET	5
IGKV10-94*01	IGKJ1*01	QHYSS	5		IGKV3-4*01	IGKJ4*01	QQSNEL	6		IGKV10-94*01	IGKJ1*01	QHYET	5
IGKV10-94*01	IGKJ1*01	QHYSS	5		IGKV3-4*01	IGKJ4*01	QQSNEL	6		IGKV10-94*01	IGKJ1*01	QQYET	5
IGKV10-94*01	IGKJ1*01	QHYSS	5		IGKV3-4*01	IGKJ4*01	QQSNEL	6		IGKV10-94*01	IGKJ1*01	QQYET	5
IGKV10-94*01					IGKV3-4*01	IGKJ4*01	QQSNEL	6		IGKV10-94*01	IGKJ1*01	QQYET	5
IGKV10-94*01					IGKV3-4*01	IGKJ4*01	QQSNEL	6		IGKV10-94*01	IGKJ1*01	QQYET	5
IGKV10-94*01					IGKV3-4*01	IGKJ4*01	QQSNEL	6		IGKV10-94*01	IGKJ1*01	QQYET	5
IGKV10-94*01					IGKV3-4*01	IGKJ4*01	QQSNEL	6		IGKV10-94*01	IGKJ1*01	QQYET	5
IGKV10-94*01					IGKV3-4*01	IGKJ4*01	QQSNEL	6		IGKV10-94*01	IGKJ1*01	QQYET	5
IGKV10-94*01					IGKV3-4*01	IGKJ4*01	QQSNEL	6		IGKV10-94*01	IGKJ1*01	QQYET	5
IGKV10-94*01					IGKV3-4*01	IGKJ4*01	QQSNEL	6		IGKV10-94*01	IGKJ1*01	QQYET	5
IGKV10-94*01					IGKV3-4*01	IGKJ4*01	QQSNEL	6		IGKV10-94*01	IGKJ1*01	QQYET	5
IGKV10-94*01					IGKV3-4*01	IGKJ4*01	QQSNEL	6		IGKV10-94*01	IGKJ1*01	QHYET	5
IGKV10-94*01					IGKV3-4*01	IGKJ4*01	QQSNEL	6		IGKV10-94*01	IGKJ1*01	QHYET	5
IGKV10-94*01					IGKV3-4*01	IGKJ4*01	QQSNEL	6		IGKV10-94*01	IGKJ1*01	QHYET	5
IGKV10-94*01					IGKV3-4*01	IGKJ4*01	QQSNEL	6		IGKV10-94*01	IGKJ1*01	QHYET	5
					IGKV3-4*01	IGKJ4*01	QQSNEL	6		IGKV10-94*01	IGKJ1*01	QHYET	5
IGKV3-12*01	IGKJ4*01	QHSWELET	8		IGKV3-4*01	IGKJ4*01	QQSNEL	6		IGKV10-94*01	IGKJ1*01	QHYET	5
IGKV3-12*01	IGKJ4*01	QHSWELET	8		IGKV3-4*01	IGKJ4*01	QQSNEL	6		IGKV10-94*01	IGKJ1*01	QHYET	5
IGKV3-12*01	IGKJ4*01	QHSWELET	8		IGKV3-4*01	IGKJ4*01	QQSNEL	6		IGKV10-94*01	IGKJ1*01	QHYET	5
IGKV3-12*01	IGKJ1*01	QHSWELET	8		IGKV3-4*01	IGKJ4*01	QQSNEL	6		IGKV10-94*01	IGKJ2*01	QHXDT	5
IGKV3-12*01	IGKJ1*01	QHSWELET	8		IGKV3-4*01	IGKJ4*01	QQSNEL	6
IGKV3-12*01	IGKJ1*01	QHSWELET	8		IGKV3-4*01	IGKJ4*01	QQSNEL	6		IGKV4-80*01	IGKJ5*01	HQWNIIRALT	10
IGKV3-12*01	IGKJ1*01	QHSWELET	8		IGKV3-4*01	IGKJ4*01	QQSNEL	6		IGKV4-80*01	IGKJ5*01	HQWSIIRALT	10
IGKV3-12*01	IGKJ1*01	QHSWELET	8		IGKV3-4*01	IGKJ4*01	QQSNEL	6
IGKV3-12*01	IGKJ1*01	QHSWEPET	8		IGKV3-4*01	IGKJ4*01	QQSNEL	6		IGKV4-57*01	IGKJ4*01	QHLET	5
					IGKV3-4*01	IGKJ4*01	QQSNEL	6		IGKV4-57*01	IGKJ4*01	QHLET	5
IGKV4*01	IGKJ4*01	QQFEG	5		IGKV3-4*01	IGKJ4*01	QQSNEL	6
IGKV4*01	IGKJ4*01	QQFEG	5		IGKV3-4*01	IGKJ4*01	QQSNEL	6		Singles
IGKV4*01	IGKJ4*01	QQFEG	5		IGKV3-4*01	IGKJ4*01	QQSNEL	6		IGKV8-30*01	IGKJ2*01	QQYCSYPCTRS	11
IGKV4*01	IGKJ4*01	QQFEG	5		IGKV3-4*01	IGKJ4*01	QQSNEL	6		IGKV3-4*01	IGKJ4*01	QQCNEE	6
IGKV4*01	IGKJ4*01	QQFEG	5		IGKV3-4*01	IGKJ4*01	QQSNEL	6		IGKV4-74*01	IGKJ1*01	TSIIXPPKR*VEAP
IGKV4*01	IGKJ4*01	QQFEG	5		IGKV3-4*01	IGKJ4*01				IGKV3-12*01	IGKJ1*01	XXXWXLET
IGKV4*01	IGKJ4*01	QQFEG	5		IGKV3-4*01	IGKJ4*01
					IGKV3-4*01
					IGKV3-4*01
					Singles
					IGKV3-5*01	IGKJ5*01	QQSNEDPPT	9
					IGKV10-96*01	IGKJ2*01	QQGNPLHYT	9
